# Supplementary material for: High-performance metal oxide nanoparticle materials synthesised using polar aprotic solvents for advanced supercapacitor applications
Source: Royal Society of Chemistry journal article supplement (doi:10.1039/d5nr01871d), 2025-01-01
Supplement: d5nr01871d1.pdf [file d5nr01871d1.pdf]

**High-Performance Metal Oxide Nanoparticle Materials Synthesised Using Polar Aprotic Solvents for  
Advanced Supercapacitor Applications.**

**Authors: Muhammad Nasir Hussain<sup>a,b</sup>, Abid Inayat<sup>a</sup>, Syed Mujtaba Shah<sup>a</sup>, Mohammad Ihsun<sup>b</sup>, Ali  
Haider<sup>a</sup>, Syed Mustansar Abbas<sup>c</sup>, Stephen G. Hickey<sup>b\*</sup>**

- a. Department of Chemistry, Quaid-i-Azam University, Islamabad, 45320, Pakistan.*
- b. School of Chemistry and Biosciences, University of Bradford, BD7 1DP, United Kingdom.*
- c. Nanoscience and Technology Department, National Centre for Physics, Islamabad, Pakistan.*

## **Physical Characterization and Sample Preparation Methods**

### **Powder X-ray Diffraction (XRD).**

P-XRD analysis was recorded on a Bruker advance AXS D8 diffractometer using a Cu source running at 30 kV and 10 mA with the as-prepared nanostructured powders being placed on a silicon wafer. The instrument was controlled using the WinXPow software package and the materials were referenced using the inorganic Crystal Structure Database.

### **Raman and FT-IR Spectroscopy.**

Raman spectra of the as-prepared nanostructures were obtained following excitation using a 633 nm diode-pumped solid-state laser and recorded on a Renishaw InVia instrument equipped with a Leica microscope at a spectral resolution of approximately  $2\text{ cm}^{-1}$ . The samples were prepared by spreading the nanostructured powder onto a thin Al film. To prevent samples from heating under the microscope lens, the incident laser power was maintained below 0.02 mW. Furthermore, additional information concerning the chemical nature of the nanostructures was elucidated via FT-IR (PerkinElmer Frontier 100) equipped with attenuated total reflectance (ATR), with the IR beam directed onto the sample from below to a depth of 1 to 2 micrometres.

### **X-ray photoelectron spectroscopy (XPS).**

A Kratos Axis Super XPS (X-ray Photoelectron Spectroscopy) instrument equipped with a monochromatic Al  $K_{\alpha}$  X-ray source ( $h\nu = 1486.6\text{ eV}$ ) was used to carry out XPS analysis. The adventitious C 1s peak, with a binding energy of 284.8 eV, was taken as reference against which the binding energies of all other elements are quoted.

### **Scanning electron microscopy, elemental mapping, and energy-dispersive X-ray spectroscopy.**

SEM was used to analyse the surface morphology of the as-prepared nanostructures. The scanning electron microscope (SEM, FEI Quanta 400) was equipped with an Oxford Instruments Xplore 30 EDS detector. The samples were prepared by uniformly depositing powders on Al stubs followed by sputtering with a layer of carbon to prevent the build-up of charge. Furthermore, elemental mapping and energy-dispersive X-ray spectroscopy (EDX) were carried out simultaneously using conventional SEM analysis to determine the homogeneous particle distribution and composition. The images were recorded using an accelerating voltage of 10 kV and the spectra were acquired for 300 s live time. Standardless quantification was applied using Aztec Energy EDS software.

### Transmission Electron Microscopy (TEM).

Transmission electron microscopy images of the as-prepared samples were acquired by dispersion of the samples in water, dropping onto carbon coated copper grids followed by solvent evaporation. Imaging was carried out on a JEOL JEM-1200 EX MKII microscope, equipped with a thermionic gun (tungsten filament), operating at an acceleration voltage of 120 kV.

### Thermogravimetric analysis (TGA) and differential scanning calorimetry (DSC).

TGA profiles of as-prepared nanostructures were measured using a TA Instruments Q5000, under inert atmosphere ( $N_2$ ) and a heating rate of  $10\text{ K min}^{-1}$ . DSC analysis was carried out under the same conditions using a TA Instruments Q2000. The TA universal analysis software suite was employed to evaluate the data in both cases.

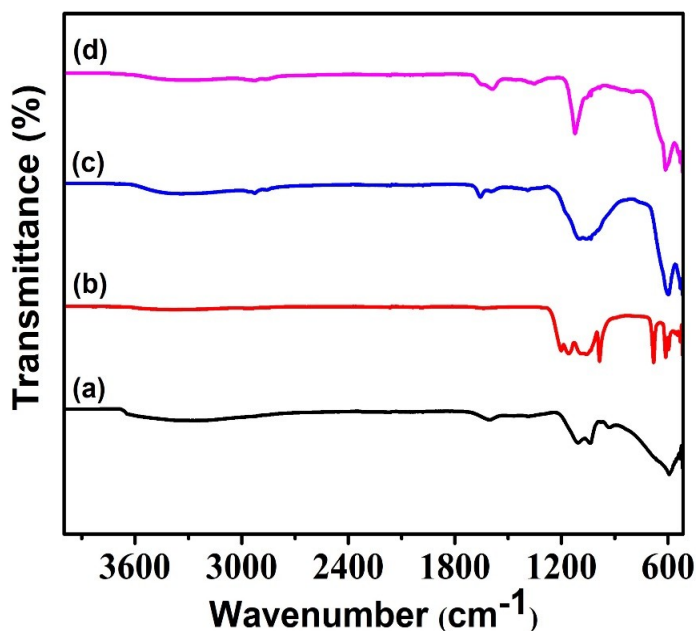

**Fig. S1.** FT-IR spectra of nanostructures (a)  $\alpha$ -Ni(OH) $_2$  nanoparticles, (b) NiO nanoparticles, (c) MnO $_2$  nanosheets, (d)  $\alpha$ -Ni(OH) $_2$ -MnO $_2$  hybrid nanomaterial.

FTIR spectra of the as-prepared nanostructures are presented in **Fig. S1**. The strong absorption peak at  $590\text{ cm}^{-1}$ , (**Fig. S1(a)**) can be ascribed to the Ni-OH stretching vibration modes of  $\alpha$ -Ni(OH) $_2$ . The broad band at  $3360\text{ cm}^{-1}$  is assigned to the vibration of O-H groups and is due to the retention of small quantities of adsorbed water by the  $\alpha$ -Ni(OH) $_2$  nanoparticles. The sharp peak around  $1610\text{ cm}^{-1}$  is characteristic of the bending mode of adsorbed water molecules. The appearance of the signal at  $1031\text{ cm}^{-1}$  confirms the

existence of carbonate ions which may be due to the adsorption of atmospheric  $\text{CO}_2$  by the hydroxide sample either during the analysis or the drying of the sample. The peaks observed at  $610\text{ cm}^{-1}$  and  $685\text{ cm}^{-1}$  in the FTIR spectrum of NiO nanoparticles **Fig. S1(b)**, correspond to the stretching mode of the Ni-O bond. It can also be seen from the profile that the broad O-H vibrations at  $3360\text{ cm}^{-1}$  have disappeared due to the dehydroxylation of  $\alpha\text{-Ni(OH)}_2$  into NiO when thermal decomposition occurs at  $500^\circ\text{C}$ . The peaks that appear at  $986\text{ cm}^{-1}$  and  $1150\text{ cm}^{-1}$  can be ascribed to the stretching vibrational modes of C-O and  $\text{SO}_4$  groups. Additionally, the FT-IR spectra of  $\text{MnO}_2$  and  $\alpha\text{-Ni(OH)}_2\text{-MnO}_2$  hybrid nanostructures display peaks at  $3360\text{ cm}^{-1}$ ,  $1660\text{ cm}^{-1}$  and  $1590\text{ cm}^{-1}$  corresponding to the O-H and H-O-H vibrational modes while the peak at  $2937\text{ cm}^{-1}$  is due to C-H stretching modes seen in **Fig. S1(c, d)**. The peaks at  $1090\text{ cm}^{-1}$  and  $1125\text{ cm}^{-1}$  are ascribed to the O-H bending modes. The absorption band at  $598\text{ cm}^{-1}$  is characteristic of O-Mn-O stretching. Moreover, the vibrational atomic modes of the  $\alpha\text{-Ni(OH)}_2\text{-MnO}_2$  nanostructure were confirmed by the presence of two strong bands at  $613\text{ cm}^{-1}$ , corresponding to Ni-O or O-Mn-O stretching (**Fig. S1(d)**).

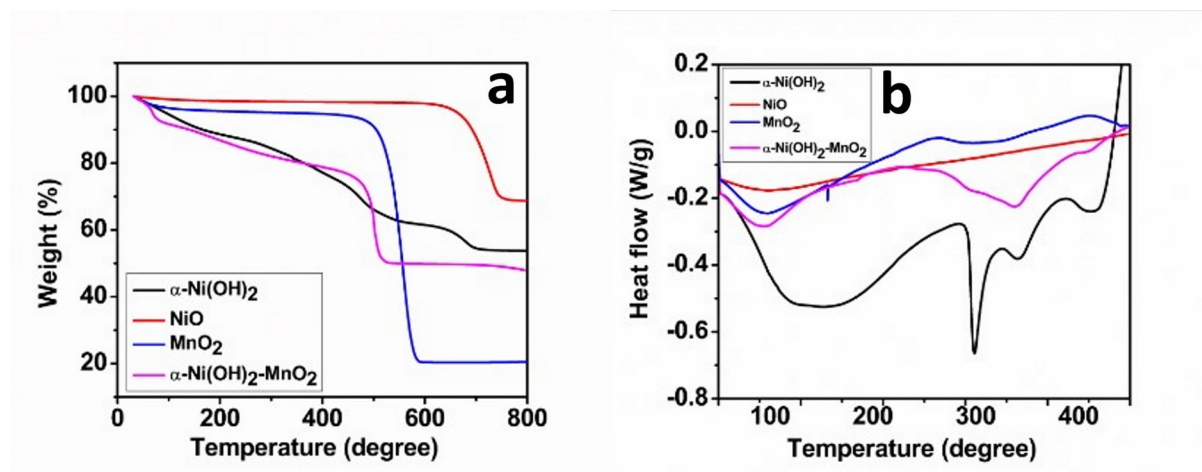

**Fig. S2.** (a) TGA and (b) DSC profiles of the nanomaterials measured under an  $\text{N}_2$  atmosphere with a heating rate of  $10\text{ K min}^{-1}$ .

The thermal changes that occur during the heat treatment between 20 and  $800^\circ\text{C}$  of the as-prepared nanostructures are presented in Figure S2. TGA analysis, **Fig. S2(a)** of the  $\alpha\text{-Ni(OH)}_2$  nanoparticles exhibit three principal mass loss steps; a mass loss of approx. 13% occurs from 20 to  $250^\circ\text{C}$  which is due to the evaporation of water of crystallisation, a mass loss of approximately 24% from 260 to  $550^\circ\text{C}$ , which represents the elimination of water molecules associated with the thermal decomposition of  $\alpha\text{-Ni(OH)}_2$  to NiO nanoparticles<sup>[1]</sup> and a mass loss of approx. 6% in the region from 630 to  $700^\circ\text{C}$  due to the oxidation of carbon to  $\text{CO}_2$ . The TGA profile of the NiO nanoparticles shows a continuous mass loss of approx. 27.6% in the temperature range from 630 to  $750^\circ\text{C}$  which can be assigned to the oxidation of carbon, present as

organic material, to  $\text{CO}_2$ . At temperatures higher than  $750^\circ\text{C}$  the TGA curve remains constant, which indicates that all carbon present has been converted to  $\text{CO}_2$ . Two mass loss events were detected for  $\text{MnO}_2$  nanoparticles with the first, occurring under  $100^\circ\text{C}$  and accounting for approx. 4% loss, is due to traces of moisture bound at the particle surface. and the second occurring from  $500$  to  $600^\circ\text{C}$  and is most likely associated with the phase transformation of two  $\text{MnO}_2$  units to form  $\text{Mn}_2\text{O}_3$ . For the  $\alpha\text{-Ni(OH)}_2\text{-MnO}_2$  hybrid nanostructures, the mass loss of approx. 8% that occurs under  $100^\circ\text{C}$  corresponds to the evaporation of surface adsorbed water, the mass loss of approx. 16% that occurs between  $110$  and  $440^\circ\text{C}$  can be ascribed to the conversion of  $\alpha\text{-Ni(OH)}_2$  to  $\text{NiO}$  and the mass loss of approx. 26% that occurs from  $480$  to  $530^\circ\text{C}$  is related to transformation of  $\text{MnO}_2$  to  $\text{Mn}_2\text{O}_3$ .

The DSC profiles confirm the TGA observations and are presented in **Fig. S2(b)**.  $\alpha\text{-Ni(OH)}_2$  nanoparticles display a broad peak in the region below  $200^\circ\text{C}$  which is related to the energy required to bring about the evaporation of strongly adsorbed water from the surface. In addition,  $\alpha\text{-Ni(OH)}_2$  exhibits a sharp and intense endothermic peak at  $300^\circ\text{C}$  with two, less intense peaks at  $340^\circ\text{C}$  and  $415^\circ\text{C}$ . The temperature range of these endothermic peaks matches well with that of the mass loss corresponding to the decomposition of  $\alpha\text{-Ni(OH)}_2$  to form  $\text{NiO}$ .  $\text{NiO}$  nanoparticles do not show any observable thermal behaviour in their DSC profiles, which is to be expected as  $\text{NiO}$  is obtained by the high temperature decomposition of  $\alpha\text{-Ni(OH)}_2$  at  $500^\circ\text{C}$ . For  $\text{MnO}_2$  and  $\alpha\text{-Ni(OH)}_2\text{-MnO}_2$  two endothermic peaks can be observed in each of the DSC profiles when the temperature is increased from  $50^\circ\text{C}$  to  $450^\circ\text{C}$ . The lower temperature endothermic peak below  $100^\circ\text{C}$  is related to the loss of absorbed water molecules incorporated during the synthesis. The broad band observed in the region from  $300^\circ\text{C}$  to  $340^\circ\text{C}$  is due to mass losses associated with the structurally associated water molecules.

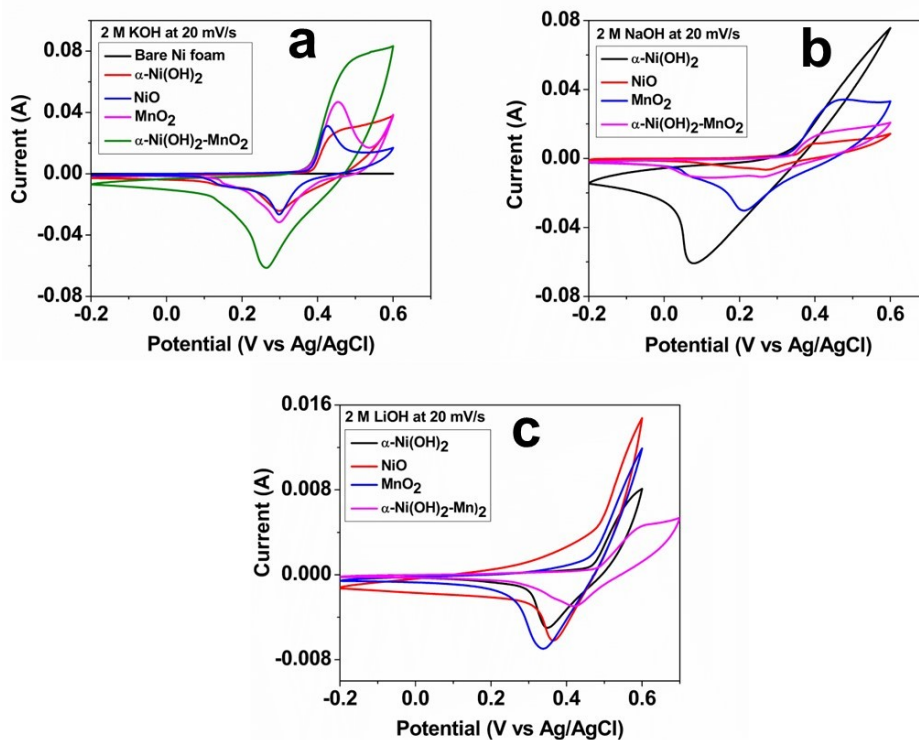

**Fig. S3.** CV profiles of  $\alpha$ -Ni(OH)<sub>2</sub>, NiO, MnO<sub>2</sub>, and  $\alpha$ -Ni(OH)<sub>2</sub>-MnO<sub>2</sub> hybrid in (a) KOH, (b) NaOH, and (c) LiOH.

#### Electrochemical Measurements in Aqueous Electrolytes.

The electrochemical behaviour of all four nanomaterials in various aqueous electrolytes, such as KOH, NaOH and LiOH, have been investigated. The CV profiles of each material, along with that of the bare nickel foam, recorded within the potential window of -0.2 to 0.6 V and at a scan rate of 20 mV/s in 3 M KOH, NaOH, and LiOH are presented in **Fig. S3(a, b, c)**. It is found that the area encompassed by the bare nickel foam curve **(a)** is negligible, demonstrating a significantly smaller charge storage capacity than the active materials. In contrast, the area enclosed within the CV curves increases in the different electrolytes in the order LiOH < NaOH < KOH, indicating a good electrochemical performance of the synthesized materials. Of the three electrolytes employed here, the active materials display a clearly defined pair of redox peaks in KOH indicating its suitability for further electrochemical studies. The trends in the electrochemical performance observed can be explained by the hydrated ionic radii of the electrolyte cations with K<sup>+</sup> (0.3 nm) possessing the smallest of the three hydrated ionic radii compared to Na<sup>+</sup> (0.4 nm) and Li<sup>+</sup> (0.6 nm).<sup>[2]</sup>

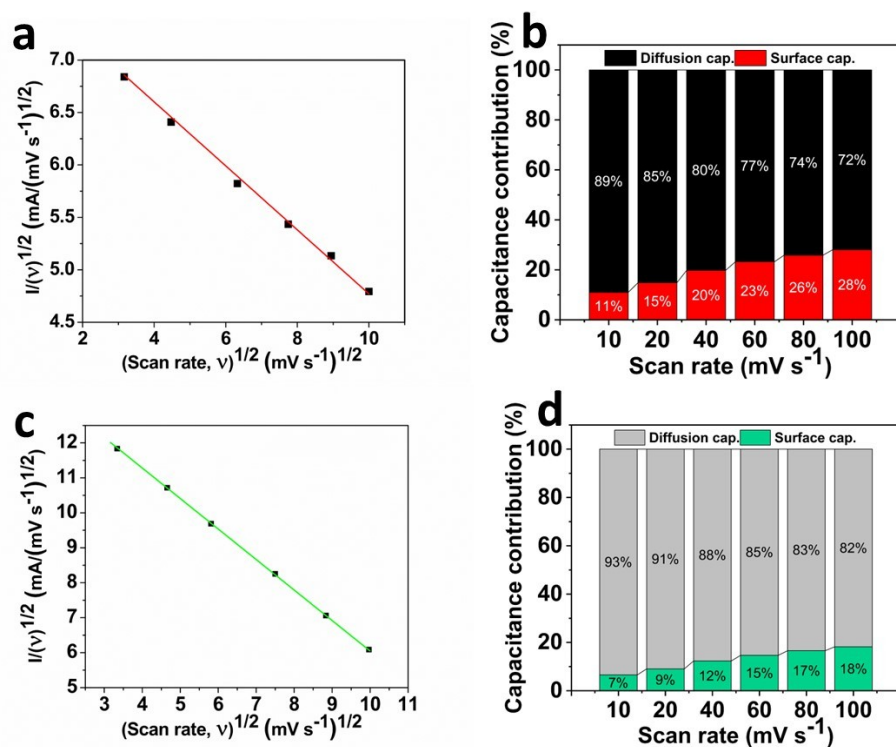

**Fig.S4.** Quantitative capacitive analysis of  $\alpha$ -Ni(OH)<sub>2</sub> and MnO<sub>2</sub> hybrid material, (a, c) plots of  $(i/v^{1/2})$  vs  $(v^{1/2})$ , (b, d) contribution of surface and diffusion capacities at various scan rates.

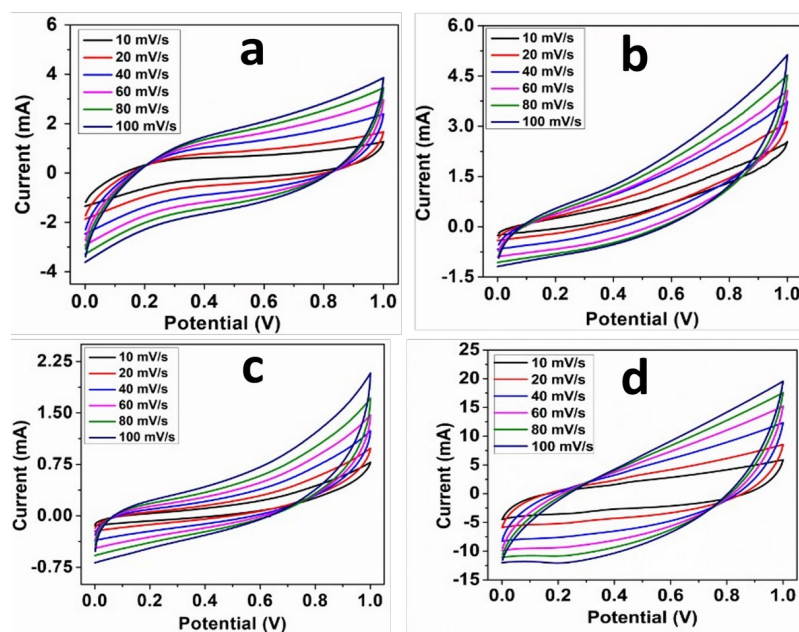

**Fig. S5.** CV profiles of symmetric devices of a)  $\alpha$ -Ni(OH)<sub>2</sub> nanoparticles, b) NiO nanoparticles, c) MnO<sub>2</sub> nanoparticles and d)  $\alpha$ -Ni(OH)<sub>2</sub>–MnO<sub>2</sub> hybrid.

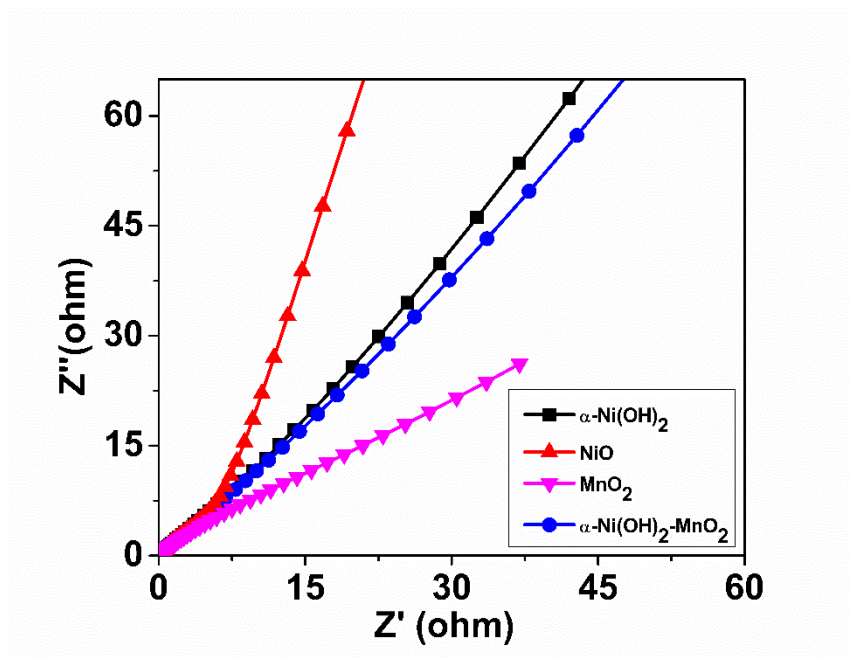

**Fig. S6.** Nyquist plots after cyclic stability test.

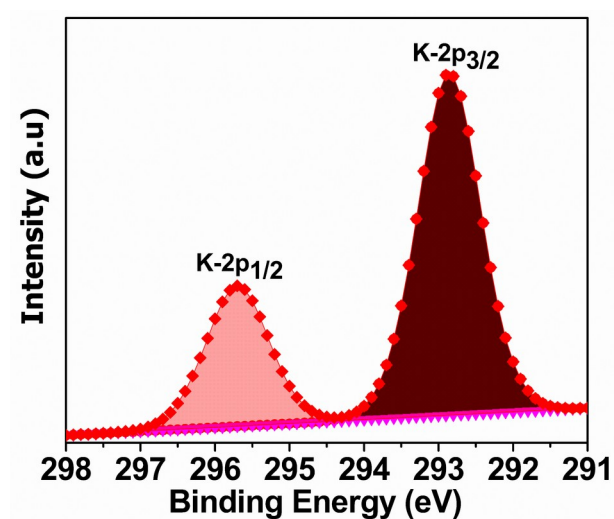

**Fig. S7.** XPS profile of k-2p which appeared after the stability test.

The k-2p peaks appear in the XPS spectra due to the presence of KOH which was employed as the background electrolyte for the electrochemical investigations. The before and after XPS spectrum confirms that no oxidation state changes occurred for each element present in the  $\alpha\text{-Ni(OH)}_2$  and  $\text{MnO}_2$  in the hybrid material.

**Ni(OH)<sub>2</sub> Crystallite size.**

| Sr. No | K    | Wavelength | 2-Theta  | FWHM    | Crystallite Size |
|--------|------|------------|----------|---------|------------------|
| 1      | 0.94 | 1.54178    | 11.78542 | 3.23025 | 2.58427          |
| 2      | 0.94 | 1.54178    | 24.12559 | 3.46917 | 2.44762          |
| 3      | 0.94 | 1.54178    | 34.00855 | 4.60474 | 1.88574          |
| 4      | 0.94 | 1.54178    | 60.13117 | 3.42287 | 2.8031           |

**NiO Crystallite size.**

| Sr. No | K    | Wavelength | 2-Theta  | FWHM    | Crystallite Size |
|--------|------|------------|----------|---------|------------------|
| 1      | 0.94 | 1.54178    | 37.39479 | 1.06238 | 8.25163          |
| 2      | 0.94 | 1.54178    | 43.49531 | 1.24824 | 7.16211          |
| 3      | 0.94 | 1.54178    | 63.13925 | 1.42509 | 6.83894          |
| 4      | 0.94 | 1.54178    | 75.71695 | 1.70905 | 6.15389          |

**MnO<sub>2</sub> Crystallite size.**

| Sr. No | K    | Wavelength | 2-Theta  | FWHM    | Crystallite Size |
|--------|------|------------|----------|---------|------------------|
| 1      | 0.94 | 1.54178    | 18.40761 | 0.37355 | 22.51914         |
| 2      | 0.94 | 1.54178    | 29.38925 | 0.50559 | 16.97919         |
| 3      | 0.94 | 1.54178    | 32.99512 | 0.75573 | 11.45945         |
| 4      | 0.94 | 1.54178    | 36.39979 | 0.42851 | 20.39862         |
| 5      | 0.94 | 1.54178    | 44.69062 | 0.42249 | 21.24992         |
| 6      | 0.94 | 1.54178    | 60.44018 | 0.80971 | 11.86807         |

**$\alpha$ -Ni(OH)<sub>2</sub>-MnO<sub>2</sub> Crystallite Size.**

| Sr. No | K    | Wavelength | 2-Theta  | FWHM    | Crystallite Size |
|--------|------|------------|----------|---------|------------------|
| 1      | 0.94 | 1.54178    | 18.35605 | 0.36204 | 23.23337         |
| 2      | 0.94 | 1.54178    | 31.13158 | 0.58201 | 14.81053         |
| 3      | 0.94 | 1.54178    | 33.07908 | 0.67515 | 12.82994         |
| 4      | 0.94 | 1.54178    | 36.28721 | 0.55359 | 15.7846          |
| 5      | 0.94 | 1.54178    | 60.51974 | 0.81743 | 11.76075         |

The particle sizes reported above have been obtained from PXRD are thus derived indirectly from the width of diffraction peaks in the X-ray diffraction pattern. The size information provided by PXRD is therefore that of the crystallite domain sizes within the material but does not necessarily represent the actual spatial particle size as PXRD assumes ideal crystal geometry and neglects the presence of non-crystalline components, defects, and other surface effects. TEM images directly provide the spatial extent of individual particles at the nanoscale and so provides a representation of the particles that includes their morphology, size, and size distribution. Consequently, it is not uncommon for these two techniques to differ in the particle sizes they report.

**References**

- [1] M. El-Kemary, N. Nagy, I. El-Mehasseb, *Mater. Sci. Semicond. Process.* **2013**, 16, 1747-1752.
- [2] R. Deka, R. Rajak, V. Kumar, S. M. Mobin, *Inorg. Chem.* **2023**, 62, 3084–3094.
